# Supplementary material for: A naturally-derived supramolecular elastomer containing green-synthesized silver nanofibers for self-repairing E-skin sensor
Source: Royal Society of Chemistry journal article supplement (doi:10.1039/c8tc05780j), 2018-12-11
Supplement: c8tc05780j1.pdf [file c8tc05780j1.pdf]

## *Supporting Information*

### **A natural-derived supramolecular elastomer containing green-synthesized silver nanofibers for self-repairing E-skin sensor**

*Yibo Yang, Jize Liu, Jie Cao, Zehang Zhou and Xinxing Zhang\**

State Key Laboratory of Polymer Materials Engineering, Polymer Research Institute of Sichuan University, Chengdu 610065, China.

E-mail: xxzwwh@scu.edu.cn.

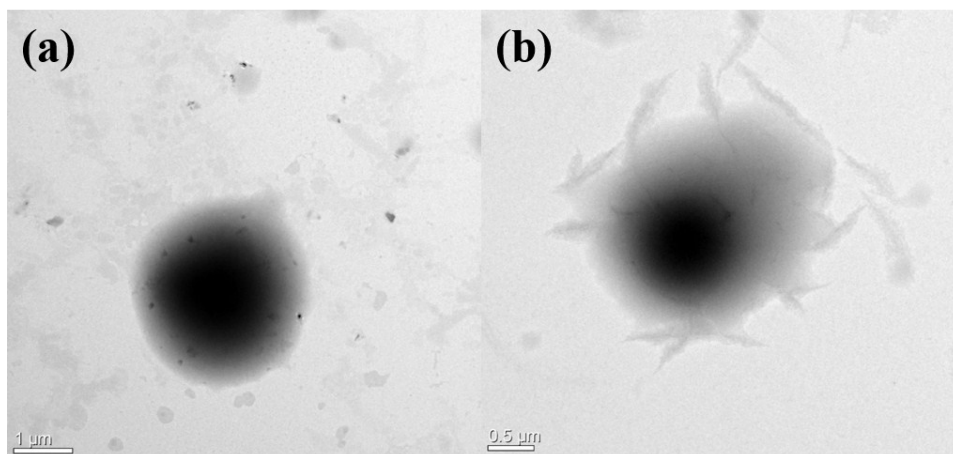

**Fig. S1** TEM images of NR (a) and CT@NR (b).

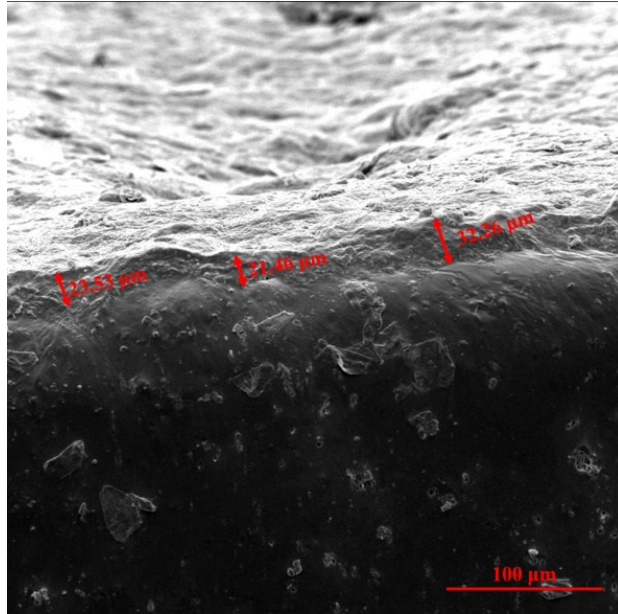

**Fig. S2** SEM image of cross-section of the strain sensor. The thickness of coating layer is marked by red arrows.

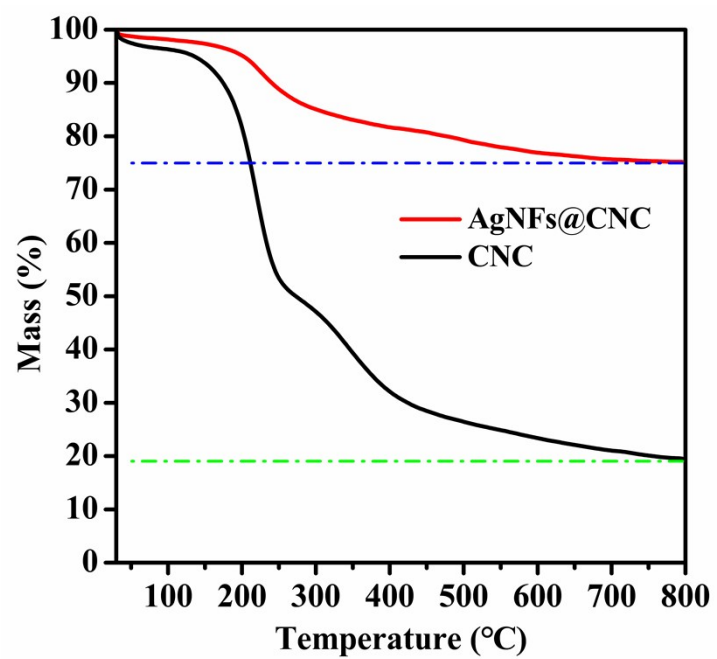

**Fig. S3** TG analysis of AgNFs@CNC and pristine CNC.

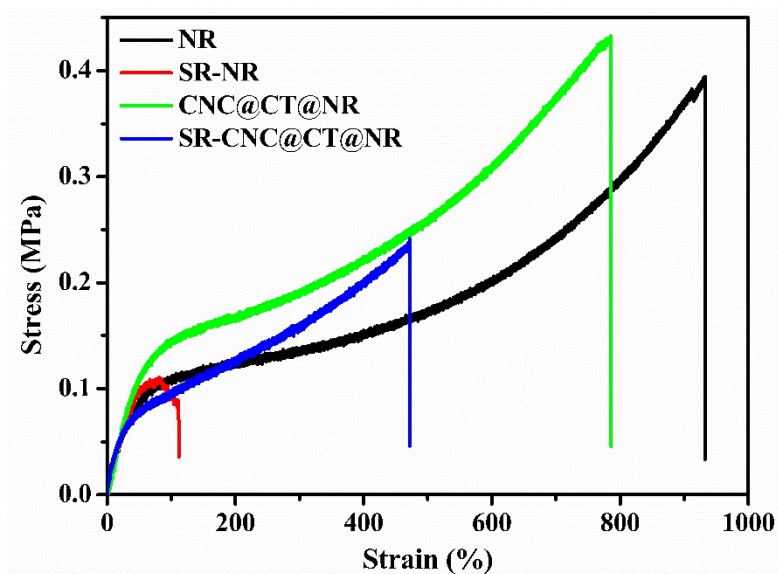

**Fig. S4** Stress-strain curves of NR, SR-NR, CNC@CT@NR and SR-CNC@CT@NR.

The self-repairing capacity of pure NR and CNC@CT@NR was investigated. It can be clearly observed in **Fig. S4** that without constructing the supramolecular structure, pure NR presents poor real-time self-repairability at room temperature. Besides, after introducing CNC and CT, the elastomer shows better self-repairing capability compared with the pure NR mainly due to a degree of hydrogen bonding interaction between CNC and CT@NR latex, respectively. However, it cannot outperform our supramolecular elastomer in self-repairability in mechanical strength, which confirms the role of PCA in constructing effective supramolecular system.

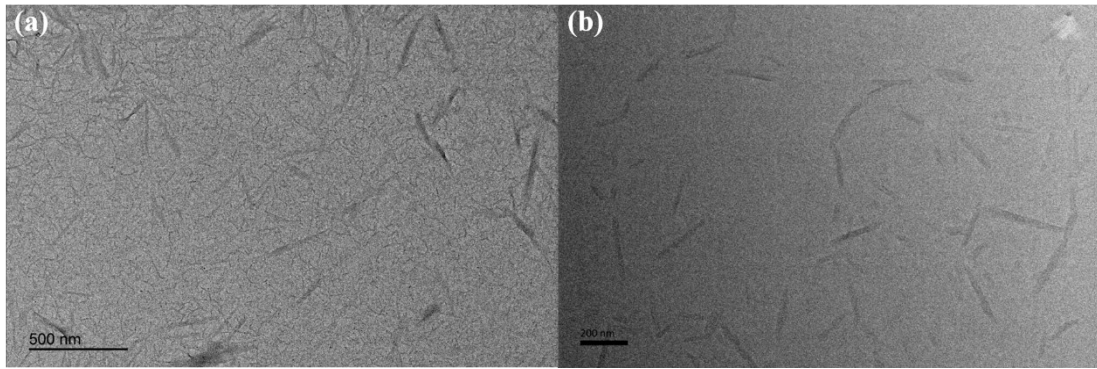

**Fig. S5** (a, b) TEM images of CNC with different magnifications.

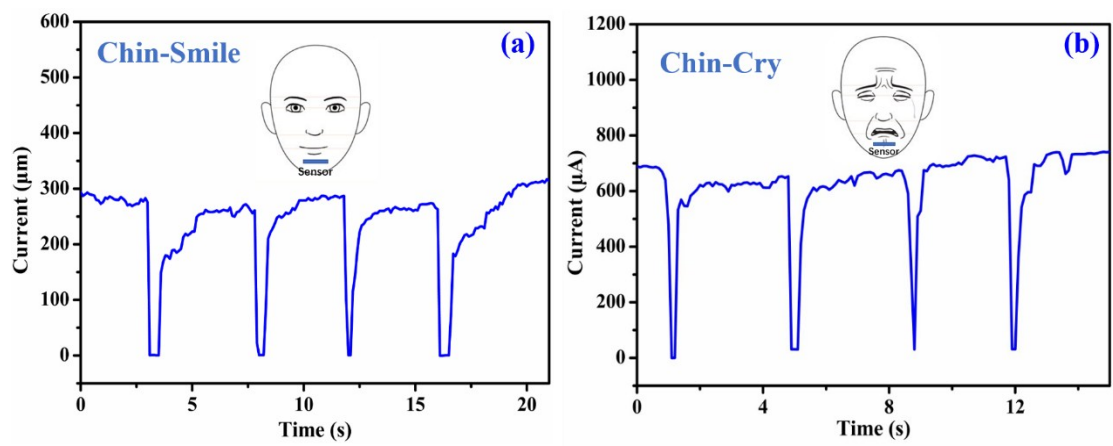

**Fig. S6** Sensor attached to chin to monitor (a) smile and (b) cry.

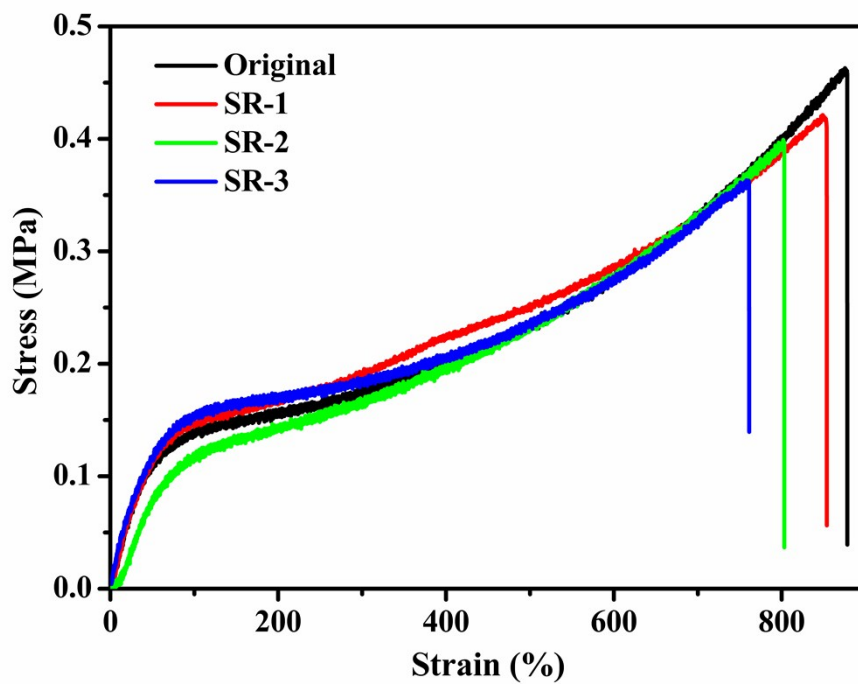

**Fig. S7** Stress-strain curves of original, 1st, 2nd and 3rd self-repaired supramolecular elastomer.



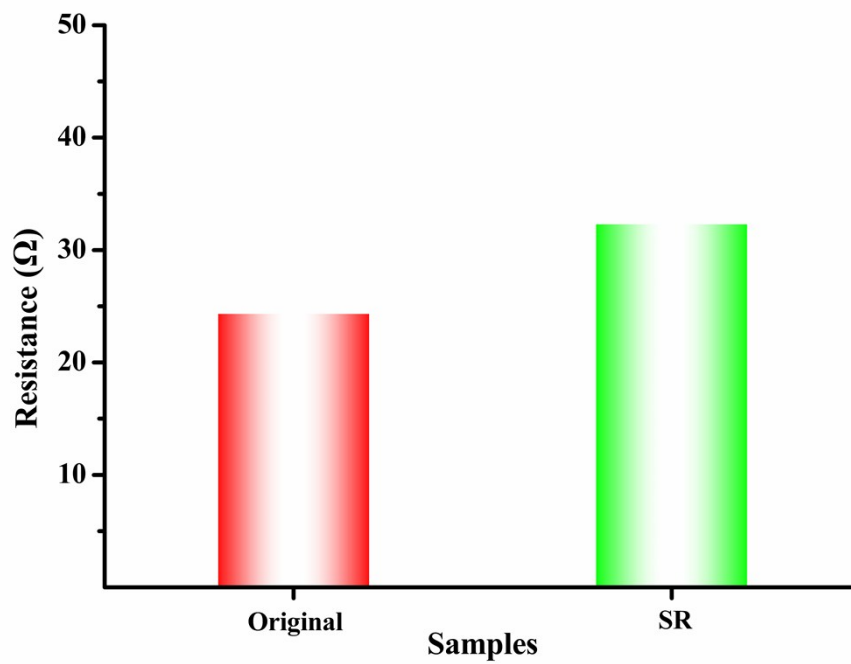

**Fig. S8** Electrical self-repairing performance of the strain sensor.

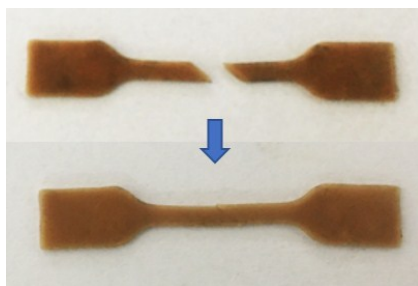

**Fig. S9** Camera photos of the damaged and self-repaired supramolecular elastomer.
